# Supplementary material for: Lgr5 Does Not Vary Throughout the Menstrual Cycle in Endometriotic Human Eutopic Endometrium
Source: MDPI journal article supplement (doi:10.3390/ijms20010022), 2018-12-21
Supplement: s1 [file s1]

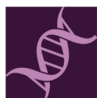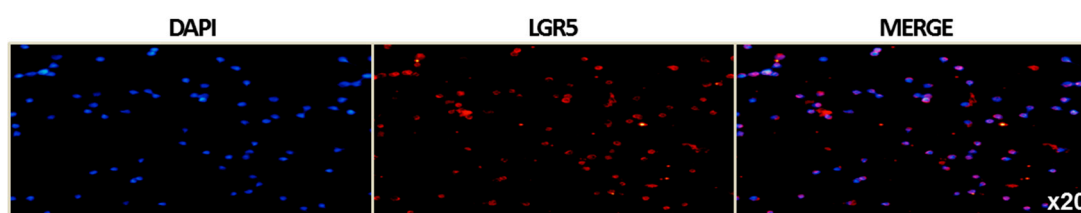

**Figure S1.** Cytospin LGR5. Cells sorted with NBP1-28904 antibody (for FACS) and stained with AP2745A antibody (for IF). Left panel shows cells stained by DAPI (blue); middle panel shows LGR5 in red; and right panel shows the merged images. Magnification: 20 $\times$ .
